# Supplementary material for: Alloying Au into a Cu/Cu 2 O/nickel foam photoanode for solar-enhanced hydrogen production coupled with glucose oxidation
Source: Royal Society of Chemistry journal article supplement (doi:10.1039/d5tc02936h), 2025-11-10
Supplement: d5tc02936h1.pdf [file d5tc02936h1.pdf]

## *Supporting Information*

### **Alloying Au into Cu/Cu<sub>2</sub>O/Nickel Foam Photoanode for Solar-Enhanced Hydrogen Production Coupled with Glucose Oxidation**

Chinh Chien Nguyen<sup>a,b\*</sup>, To Luong Nguyen<sup>c</sup>, Do Thi Thuy Van<sup>c</sup>, Trung Hieu Le<sup>d</sup>, Lam Son Le<sup>d</sup>, Minh Tuan Nguyen Dinh<sup>e</sup>, Thi Van Thi Tran<sup>d</sup>, Nguyen Dang Giang Chau<sup>d</sup>, Thi Hong Chuong Nguyen<sup>a,b</sup>, Anh Tuyen Luu<sup>f</sup>, Ekaterina Korneeva<sup>g</sup>, Nguyen Van Tiep<sup>h</sup>, My Uyen Dao<sup>a,b</sup>, Minh Khoa Duong<sup>i</sup>, and Trong-On Do<sup>i\*</sup>

<sup>a</sup>Center for Advanced Chemistry, Institute of Research and Development, Duy Tan University, Danang, 550000, Vietnam.

<sup>b</sup>Faculty of Natural sciences, Duy Tan University, Danang, 550000, Vietnam.

<sup>c</sup>Faculty of Physics and Chemistry, The University of Danang - University of Science and Education, Danang 550000, Vietnam.

<sup>d</sup>Faculty of Chemistry, Hue University of Sciences, Hue University, Thua Thien Hue 530000, Vietnam.

<sup>e</sup>The University of Danang - University of Science and Technology, Danang 550000, Vietnam.

<sup>f</sup>Center for Nuclear Technologies, Vietnam Atomic Energy Institute, Ho Chi Minh City, 700000, Vietnam.

<sup>g</sup>Flerov Laboratory of Nuclear Reactions, Joint Institute for Nuclear Research, 141980 Dubna, Moscow Reg., Russia.

<sup>h</sup>Institute of Physics, Vietnam Academy of Science and Technology, 10 Dao Tan, Ba Dinh, Hanoi 10000, Vietnam.

<sup>i</sup>Department of Chemical Engineering, Laval University, 1065 Avenue de la Médecine, Quebec, Quebec G1V0A6, Canada

\*Corresponding authors: [nguyenchinhchien@duytan.edu.vn](mailto:nguyenchinhchien@duytan.edu.vn) (C.C.N.), [Trong-On.Do@gch.ulaval.ca](mailto:Trong-On.Do@gch.ulaval.ca) (T.O.D.)

## 1. Chemicals and Experimental Session

### 1.1. Chemicals

Copper (II) nitrate trihydrate ( $\text{Cu}(\text{NO}_3)_2 \cdot 3\text{H}_2\text{O}$ ,  $\geq 99.5\%$ ), gold(III) chloride trihydrate ( $\text{HAuCl}_4 \cdot 3\text{H}_2\text{O}$ ,  $\geq 99.9\%$ ), glycerol ( $\text{C}_3\text{H}_8\text{O}_3$ ,  $\geq 99\%$ ) were supplied from Merck. Glucose ( $\text{C}_6\text{H}_{12}\text{O}_6$ ,  $99.9\%$ ) and potassium hydroxide (KOH,  $99\%$ ) were purchased from Sigma Aldrich and used without further purification. Nickel foam (NF) ( $99.9\%$ ) was used as support and provided by Beijing Beike 2D Materials Co., Ltd. Deionized water was used throughout all experiments.

### 1.2. Synthesis of Au-Cu/NF and compared samples

#### 1.2.1 Synthesis of Au-Cu/NF

The Au-Cu/NF sample was fabricated via a facile hydrothermal method. Briefly, 1.03 g  $\text{Cu}(\text{NO}_3)_2 \cdot 3\text{H}_2\text{O}$ , 0.039 g  $\text{HAuCl}_4 \cdot 3\text{H}_2\text{O}$ , and 7.30 g  $\text{C}_3\text{H}_8\text{O}_3$  were dissolved in 50.0 mL deionized water and stirred continuously for 1.5 hours. The resulting solution was transferred into a Teflon-lined autoclave. Then, the NF (3 cm x 3 cm), pre-treated in 50.0 mL of 1.0 M HCl solution for 45 minutes in a sonication bath, followed by sequentially washing with ethanol and deionized water, was placed in the prepared mixture before being hydrothermally treated at  $160\text{ }^\circ\text{C}$  for 16 h. After cooling to room temperature, the obtained material (denoted as Au-Cu/NF) was subsequently washed with deionized water and ethanol to remove residual reactants, and then dried at  $60\text{ }^\circ\text{C}$  for further experiments.

#### 1.2.2 Synthesis of Cu/NF

A similar synthetic procedure was utilized for the Cu/NF sample without the addition of Au precursor.

### 1.3. Characterizations

The morphology and chemical analysis of as-prepared catalysts were examined by scanning electron microscopy (SEM, Tescan Vega) equipped with an energy-dispersive X-ray spectroscopy (EDS) detector (Bruker 630M). High-resolution transmission electron microscopy (HR-TEM) of samples was conducted by the JEOL system. The powder X-ray diffraction (XRD) patterns were collected by XRD, Bruker D8. Raman spectra were recorded with a LabRAM spectrometer (Horiba). X-ray photoelectron spectroscopy (XPS) measurements were carried out with a Thermo Fisher Scientific spectrometer. The UV-Vis absorption spectra were obtained by a UV-Vis absorption spectrophotometer (Cary 300) in the wavelength range of 200 – 800 nm.

#### *1.4. Photoelectrochemical measurements*

The photoelectrochemical performance of the samples was conducted by an electrochemical workstation (PGSTAT204, Metrohm) in a standard three-electrode configuration, in which as-prepared samples (with an exposed area of  $1 \times 1 \text{ cm}^2$ ), platinum, and Ag/AgCl served as working, counter, and reference electrodes, respectively. The light source was supplied by a 150 W Xenon lamp (Sciencetech). The solutions of 1.0 M KOH and 1.0 M KOH + 0.10 M glucose were employed as the electrolytes. The measured potentials were converted to potential versus the reversible hydrogen electrode (vs. RHE) via the following equation:

$$E_{RHE} = E_{Ag/AgCl} + 0.059 \times pH + E_{Ag/AgCl}^0 \quad (1)$$

To activate the material, cyclic voltammetry (CV) was first performed at a scan rate of  $50 \text{ mV} \cdot \text{s}^{-1}$  for 10 cycles (**Figure S1**). Linear sweep voltammetry (LSV) was conducted at a scan rate of  $5 \text{ mV} \cdot \text{s}^{-1}$ . Electrochemical impedance spectroscopy (EIS) was carried out at a potential of 1.32 V vs. RHE over a frequency range of 0.1 Hz to 100 kHz with an amplitude of 10 mV. The stability of the catalyst was evaluated via a chronoamperometry test in an H-cell at a potential of 1.62 V vs.

RHE for 15 consecutive cycles, corresponding to a duration of 45 hours. The amount of evolved hydrogen was measured by the water displacement method.

## 2. Results

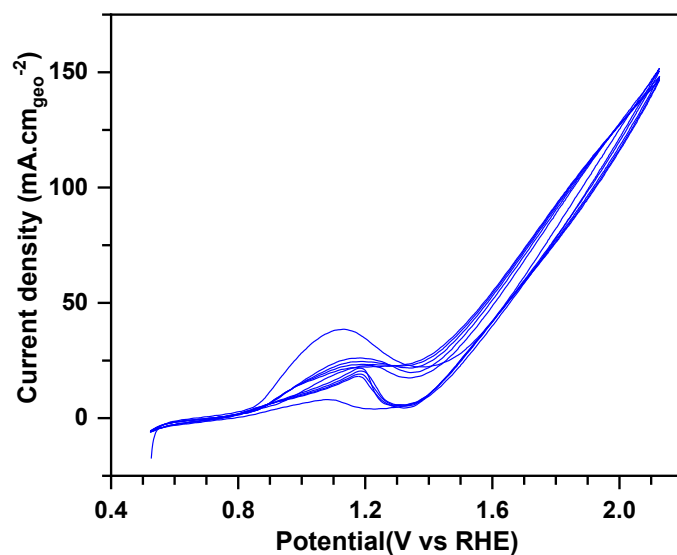

**Figure S1.** The CV curves of Au-Cu/NF sample electrode recorded for 10 cycles in 1.0 M KOH + 0.1 M glucose solution

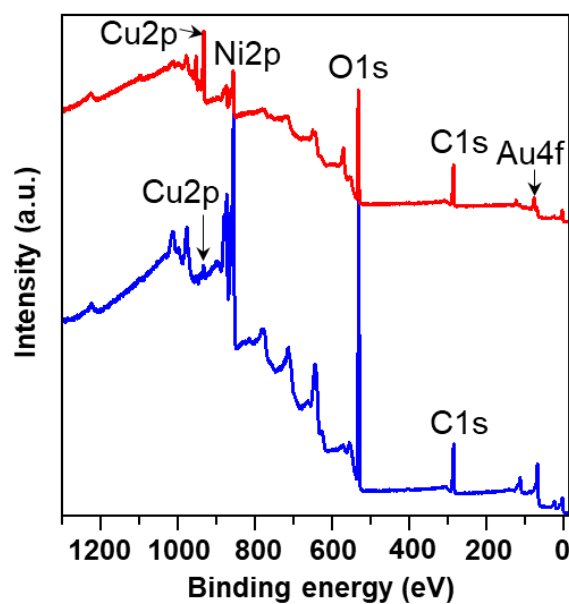

**Figure S2.** The survey XPS spectrum of Au-Cu/NF and Cu/NF.

**Table S1.** Elemental composition of as-synthesized samples according to XPS survey spectra

| Name | % Atom   |       |
|------|----------|-------|
|      | Au-Cu/NF | Cu/NF |
| C1s  | 9.83     | 28.6  |
| Cu2p | 28.56    | 0.89  |
| Ni2p | 37.36    | 19.36 |
| O1s  | 24.14    | 51.16 |
| Au4f | 0.11     |       |

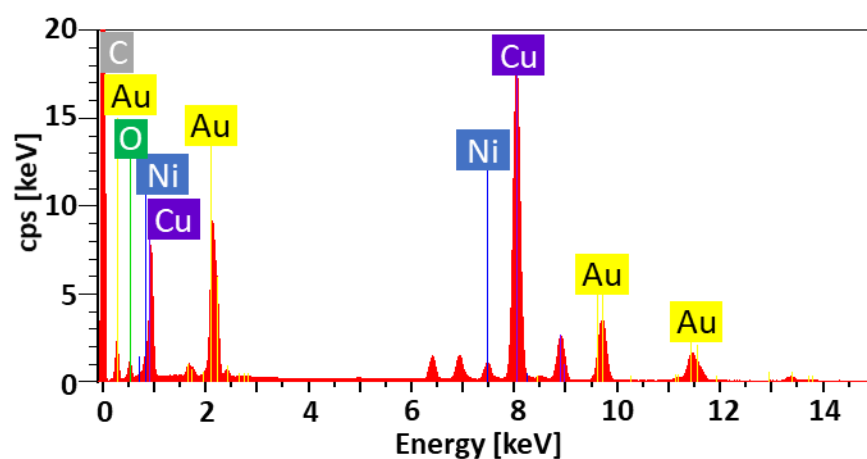

**Figure S3.** EDS spectrum of Au-Cu/NF sample.

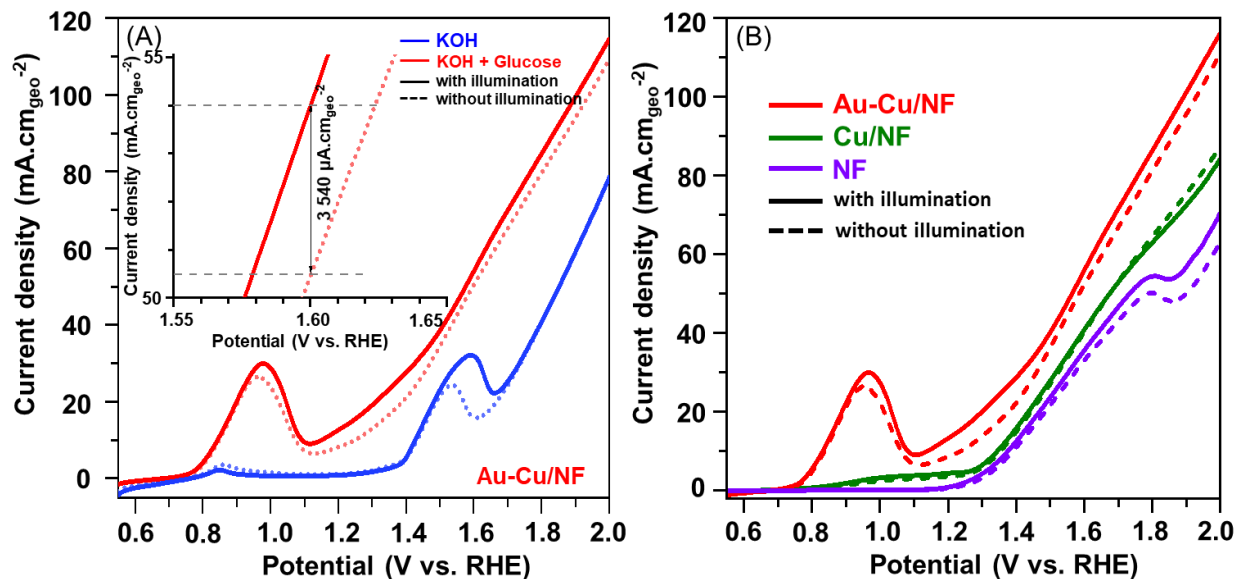

**Figure S4.** LSV-normalized curves of Au-Cu/NF sample with and without glucose (A) and LSV-normalized curves (B) of as-prepared Au-Cu/NF, Cu/NF, NF.

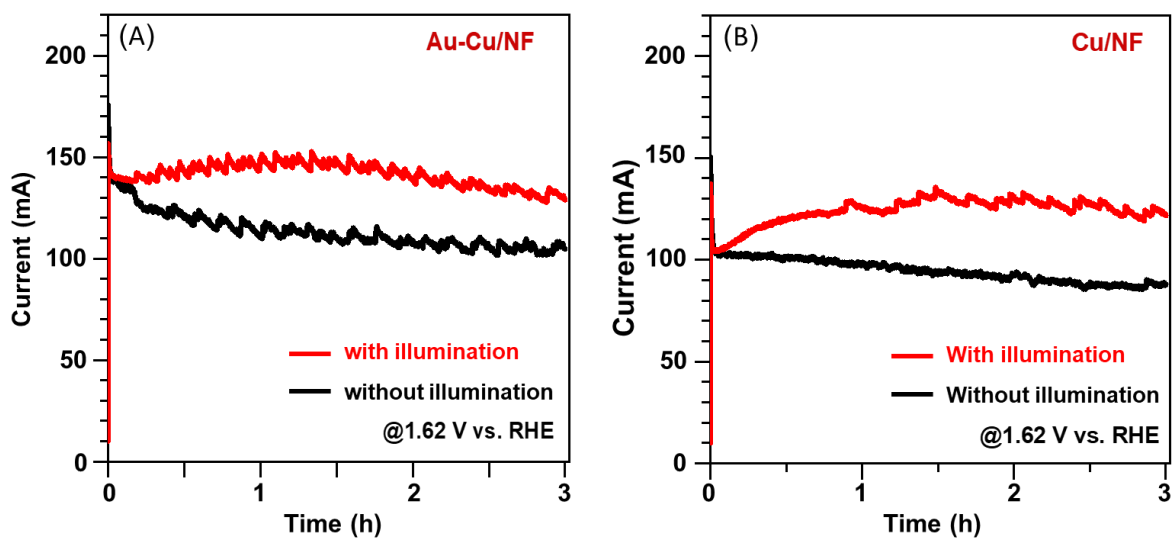

**Figure S5.** The chronoamperometry curves of as-prepared sample in 1.0 M KOH + 0.10 M Glucose.
